# Supplementary material for: Single-cell transcriptome profiling of buffelgrass (Cenchrus ciliaris) eggs unveils apomictic parthenogenesis signatures
Source: Sci Rep. 2021 May 10;11:9880. doi: 10.1038/s41598-021-89170-y (PMC8110759; doi:10.1038/s41598-021-89170-y)
Supplement: Supplementary file 3 — Supplementary Information 3. [file 41598_2021_89170_MOESM3_ESM.xlsx]

Malware scan not complete
